# Supplementary material for: Systematic review and meta-analysis of initial management of pneumothorax in adults: Intercostal tube drainage versus other invasive methods
Source: PubMed Central journal article supplement (PMC5480863; doi:10.1371/journal.pone.0178802), 2017-06-22
Supplement: pone.0178802.s003.pdf [file pone.0178802.s003.pdf]

**Conventional tube thoracostomy and other invasive interventions for pneumothorax in adults: systematic review and meta-analysis of randomized controlled trials**

*Min Joung Kim, Incheol Park, Junseok Park, Kyung Hwan Kim, Dong wun Shin*

---

**Citation**

Min Joung Kim, Incheol Park, Junseok Park, Kyung Hwan Kim, Dong wun Shin. Conventional tube thoracostomy and other invasive interventions for pneumothorax in adults: systematic review and meta-analysis of randomized controlled trials. PROSPERO 2016:CRD42016037866 Available from

[http://www.crd.york.ac.uk/PROSPERO\\_REBRANDING/display\\_record.asp?ID=CRD42016037866](http://www.crd.york.ac.uk/PROSPERO_REBRANDING/display_record.asp?ID=CRD42016037866)

**Review question(s)**

Which method shows higher early success rate for the treatment of pneumothorax? conventional tube thoracostomy vs. other invasive methods.

Which method has shorter hospital stay for the patients with pneumothorax? conventional tube thoracostomy vs. other invasive method.

Which method has lower hospital admission rate for the patients with pneumothorax? conventional tube thoracostomy vs. other invasive method.

Which method has less complication for the treatment of pneumothorax? conventional tube thoracostomy vs. other invasive method.

Which method has lower recurrence rate for the treatment of pneumothorax? conventional tube thoracostomy vs. other invasive method.

**Searches**

We search three core databases (MEDLINE, EMBASE, Cochrane library) first, and then the references of included studies and relevant reviews are hand-searched.

There is no restriction on language or publication period.

**Types of study to be included**

Inclusion criteria: randomized controlled trials including cluster-randomized trials

Exclusion criteria:

observational studies, controlled clinical trials such as quasi-randomized trials

**Condition or domain being studied**

Spontaneous and traumatic pneumothorax

**Participants/ population**

Inclusion criteria: adult patients with spontaneous and traumatic pneumothorax

Exclusion criteria: pediatric patients including new born

**Intervention(s), exposure(s)**

Inclusion criteria: Use of invasive techniques other than conventional tube thoracostomy (for example, Needle aspiration, aspiration via small bore catheter, thoracic vent)

Exclusion criteria: surgical method (thoracotomy, video assisted thoracoscopic surgery)

### **Comparator(s)/ control**

Inclusion criteria: use of conventional tube thoracostomy connected to a drainage system

### **Outcome(s)**

#### **Primary outcomes**

early success rate

The details of early success complies with the definition used in each study.

#### **Secondary outcomes**

1. Hospital admission rate
2. Length of stay for admission
3. Complication rate
4. Recurrence rate (within one year)

The details of each secondary outcome complies with the definition used in each study.

### **Risk of bias (quality) assessment**

The two reviewers independently validated the quality of each included study using the Cochrane Risk of Bias tool. Reviewers assessed the risk of bias for the six domains regarding five possible biases and rated each domain as ‘High risk of bias’, ‘Low risk of bias’, or ‘Unclear risk of bias’. Disagreement between two reviewers was resolved by discussion or consultation with a third reviewer.

### **Strategy for data synthesis**

The Mantel–Haenszel method and a random-effects model were used for combining results of included studies. To avoid unit-of-analysis error in cluster randomized controlled trials, numbers of whole and failed participants at first attempt in each study were adjusted by dividing with the design effect.

### **Analysis of subgroups or subsets**

According to the subtype of pneumothorax: first spontaneous vs. others

### **Contact details for further information**

Joon Min Park

411-706 Emergency department, Inje University Ilsanpaik hospital, Juhwa-ro 170, Ilsanseo-gu, Goyang-si, Gyeonggi-do, Korea

aero7@outlook.kr

### **Organisational affiliation of the review**

none

### **Review team**

Professor Min Joung Kim, Department of Emergency Medicine, Yonsei University College of Medicine  
Professor Incheol Park, Department of Emergency Medicine, Yonsei University College of Medicine  
Professor Junseok Park, Department of Emergency Medicine, Inje University Ilsanpaik hospital  
Professor Kyung Hwan Kim, Department of Emergency Medicine, Inje University Ilsanpaik hospital  
Professor Dong wun Shin, Department of Emergency Medicine, Inje University Ilsanpaik hospital

### **Anticipated or actual start date**

29 May 2016

**Anticipated completion date**

31 March 2017

**Funding sources/sponsors**

none

**Conflicts of interest**

None known

**Language**

English

**Country**

South Korea

**Subject index terms status**

Subject indexing assigned by CRD

**Subject index terms**

Chest Tubes; Humans; Paracentesis; Pneumothorax; Randomized Controlled Trials as Topic; Thoracostomy; Thoracotomy

**Stage of review**

Ongoing

**Date of registration in PROSPERO**

31 May 2016

**Date of publication of this revision**

27 March 2017

**Stage of review at time of this submission**

|                                                                 | <b>Started</b> | <b>Completed</b> |
|-----------------------------------------------------------------|----------------|------------------|
| Preliminary searches                                            | Yes            | Yes              |
| Piloting of the study selection process                         | Yes            | Yes              |
| Formal screening of search results against eligibility criteria | Yes            | Yes              |
| Data extraction                                                 | Yes            | Yes              |
| Risk of bias (quality) assessment                               | Yes            | Yes              |
| Data analysis                                                   | Yes            | Yes              |

---

**PROSPERO****International prospective register of systematic reviews**

The information in this record has been provided by the named contact for this review. CRD has accepted this information in good faith and registered the review in PROSPERO. CRD bears no responsibility or liability for the content of this registration record, any associated files or external websites.

---
